# Supplementary material for: CPSS 2.0: a computational platform update for the analysis of small RNA sequencing data
Source: PubMed Central journal article supplement — Bioinformatics. 2017 Feb 8;33(20):3289–91. doi: 10.1093/bioinformatics/btx066 (PMC5860027; doi:10.1093/bioinformatics/btx066), 2017-02-08

# Supplementary Figure 2

**A**

**Parameters for Single Sample**

Please enter your email (Optional)

Single sample upload

Species selection

Parameters for genome mapping tool Bowtie

Parameters for references matching tools

Parameters for miRNA target prediction

Parameters for GO and Pathway

Parameter for protein-protein interaction

**B**

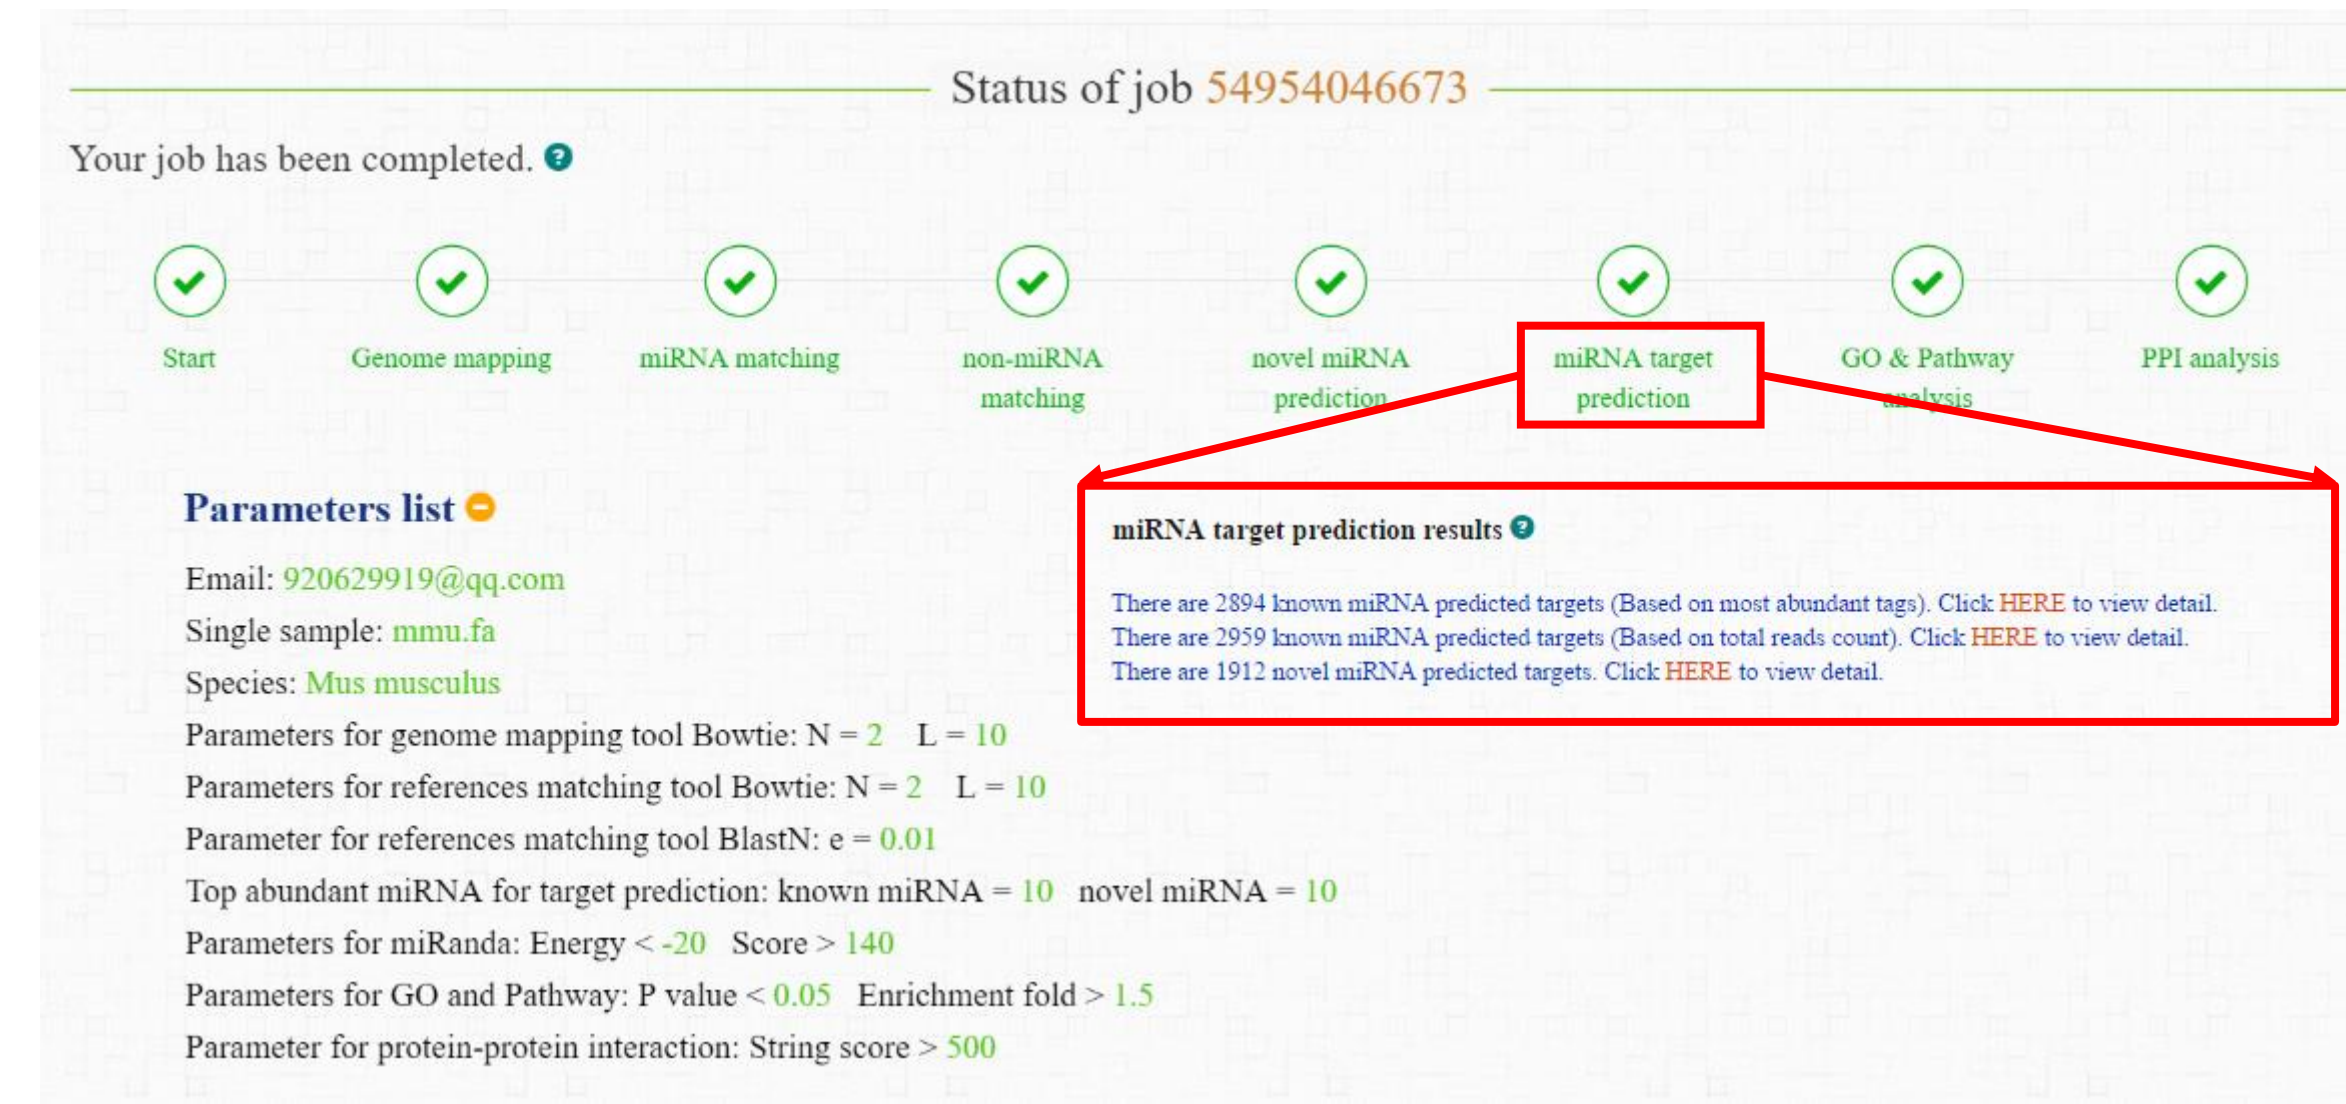

**D**

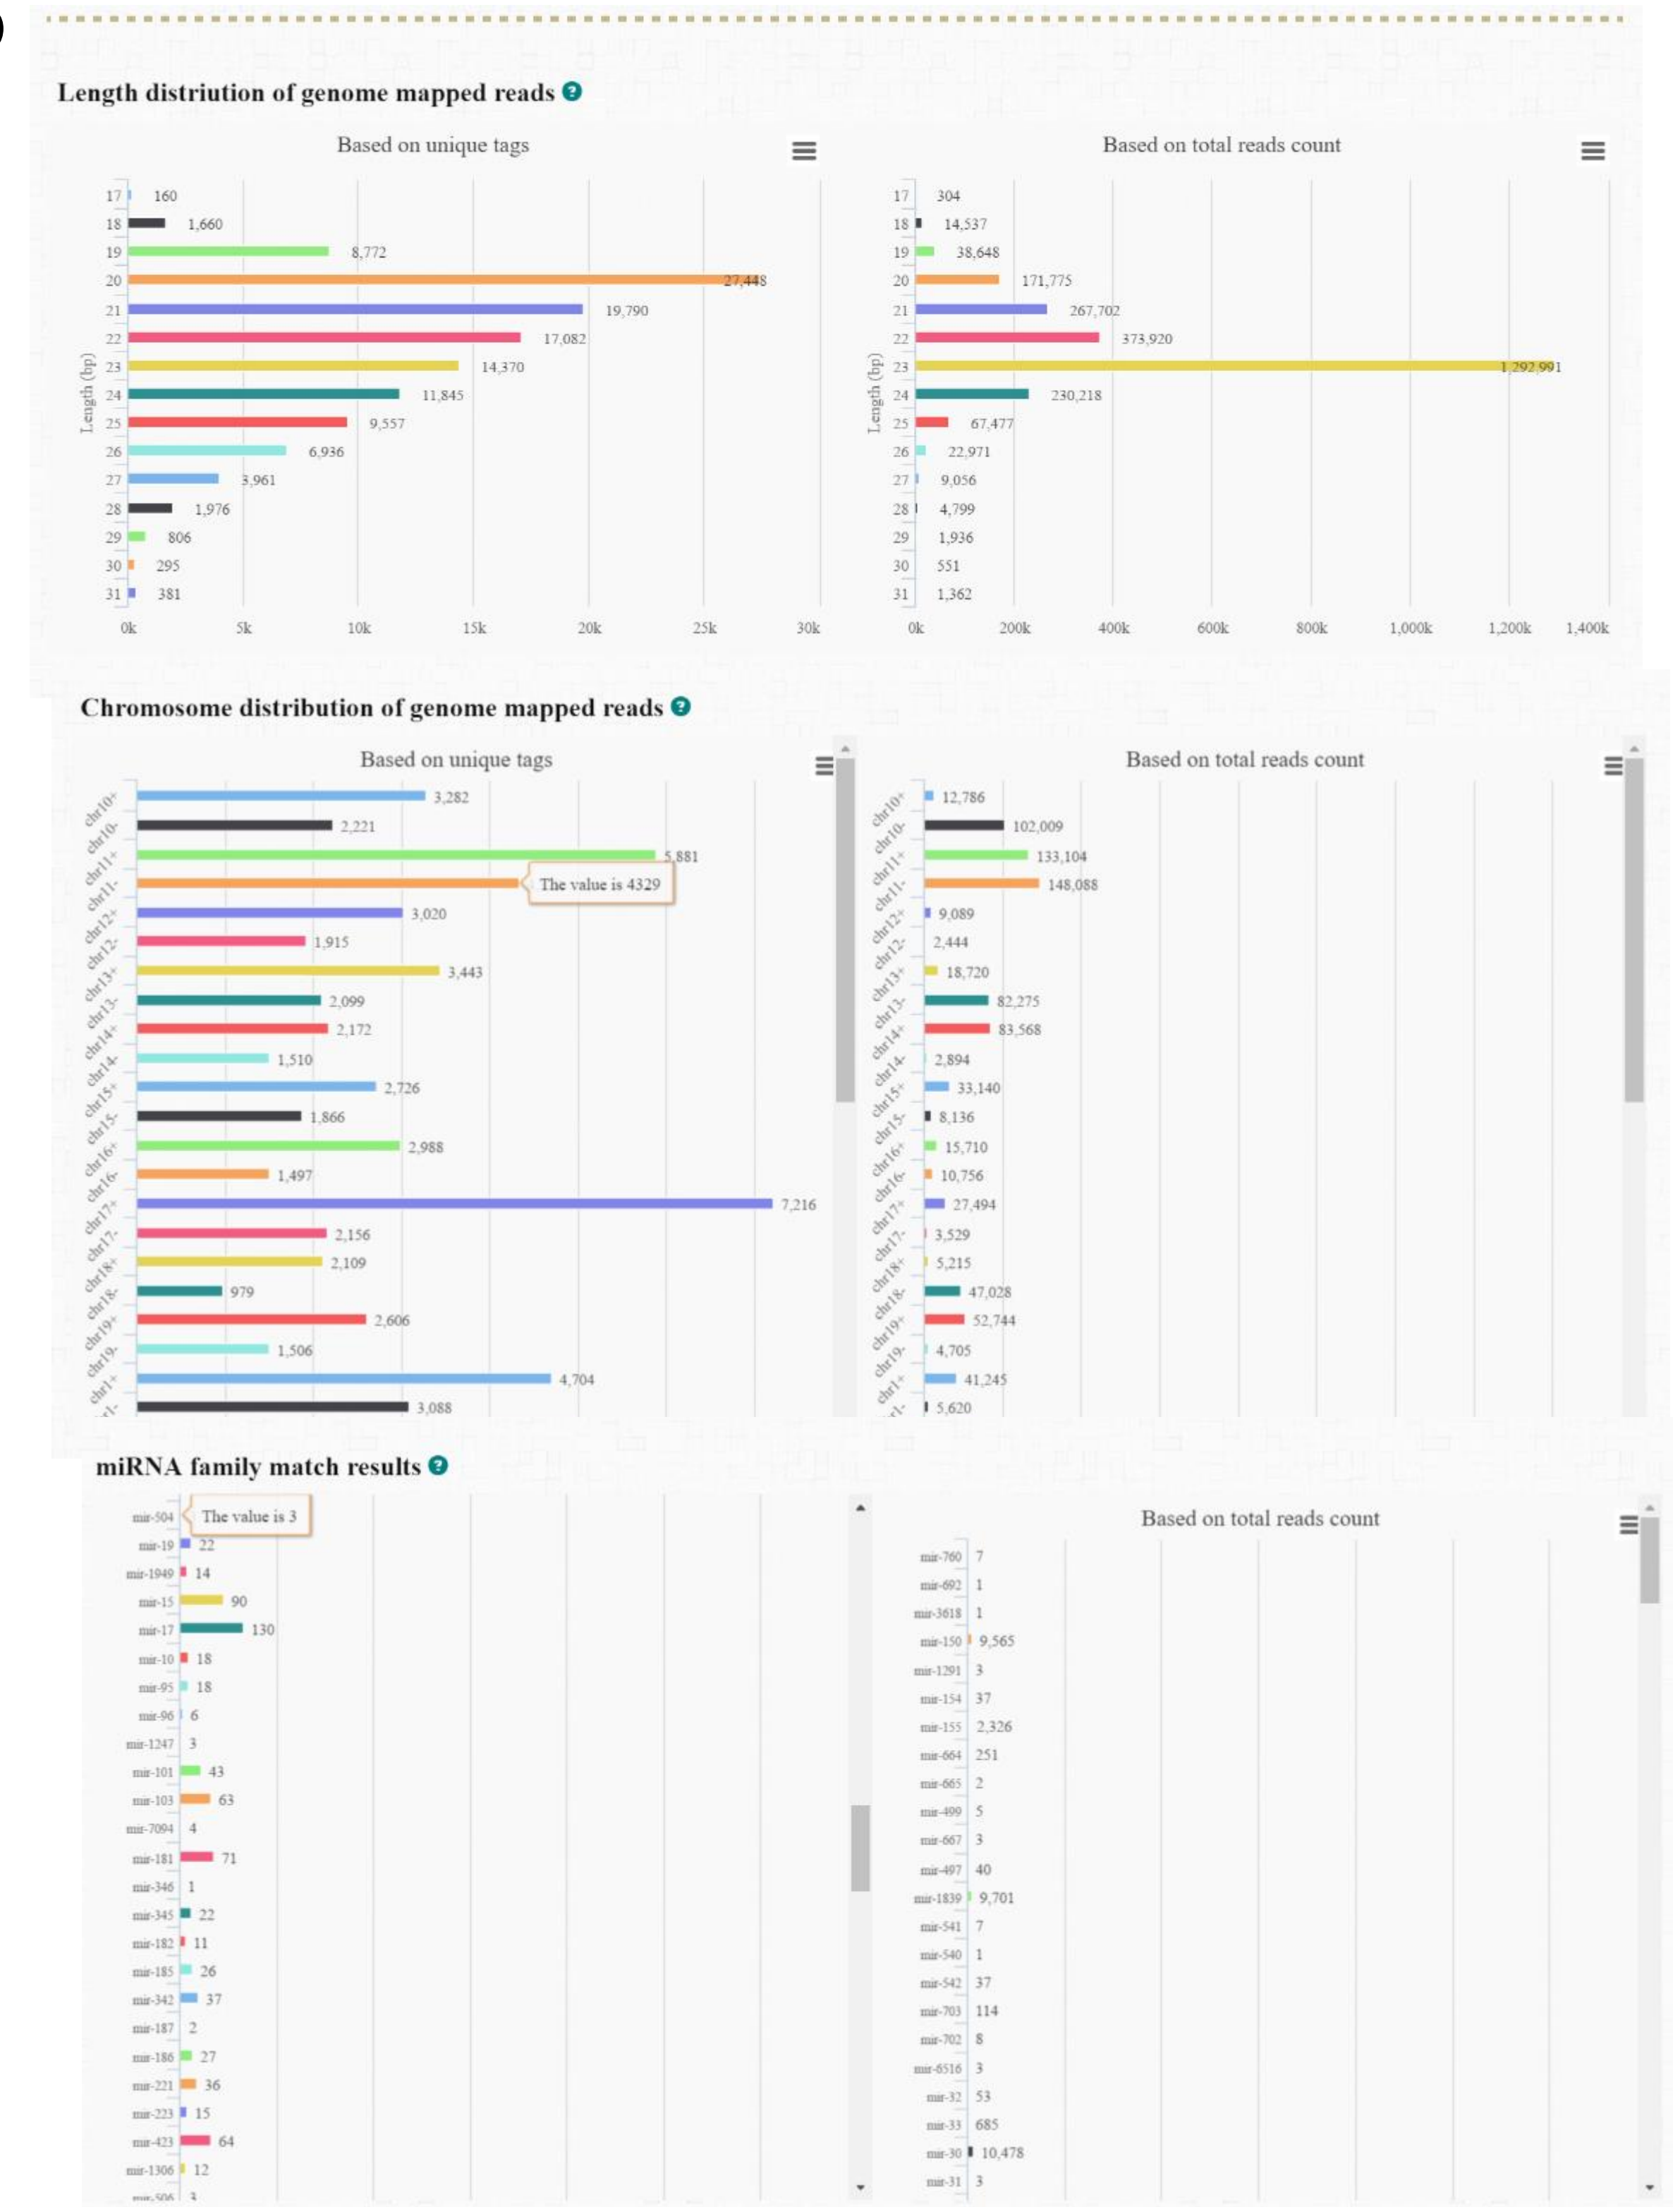

**C**

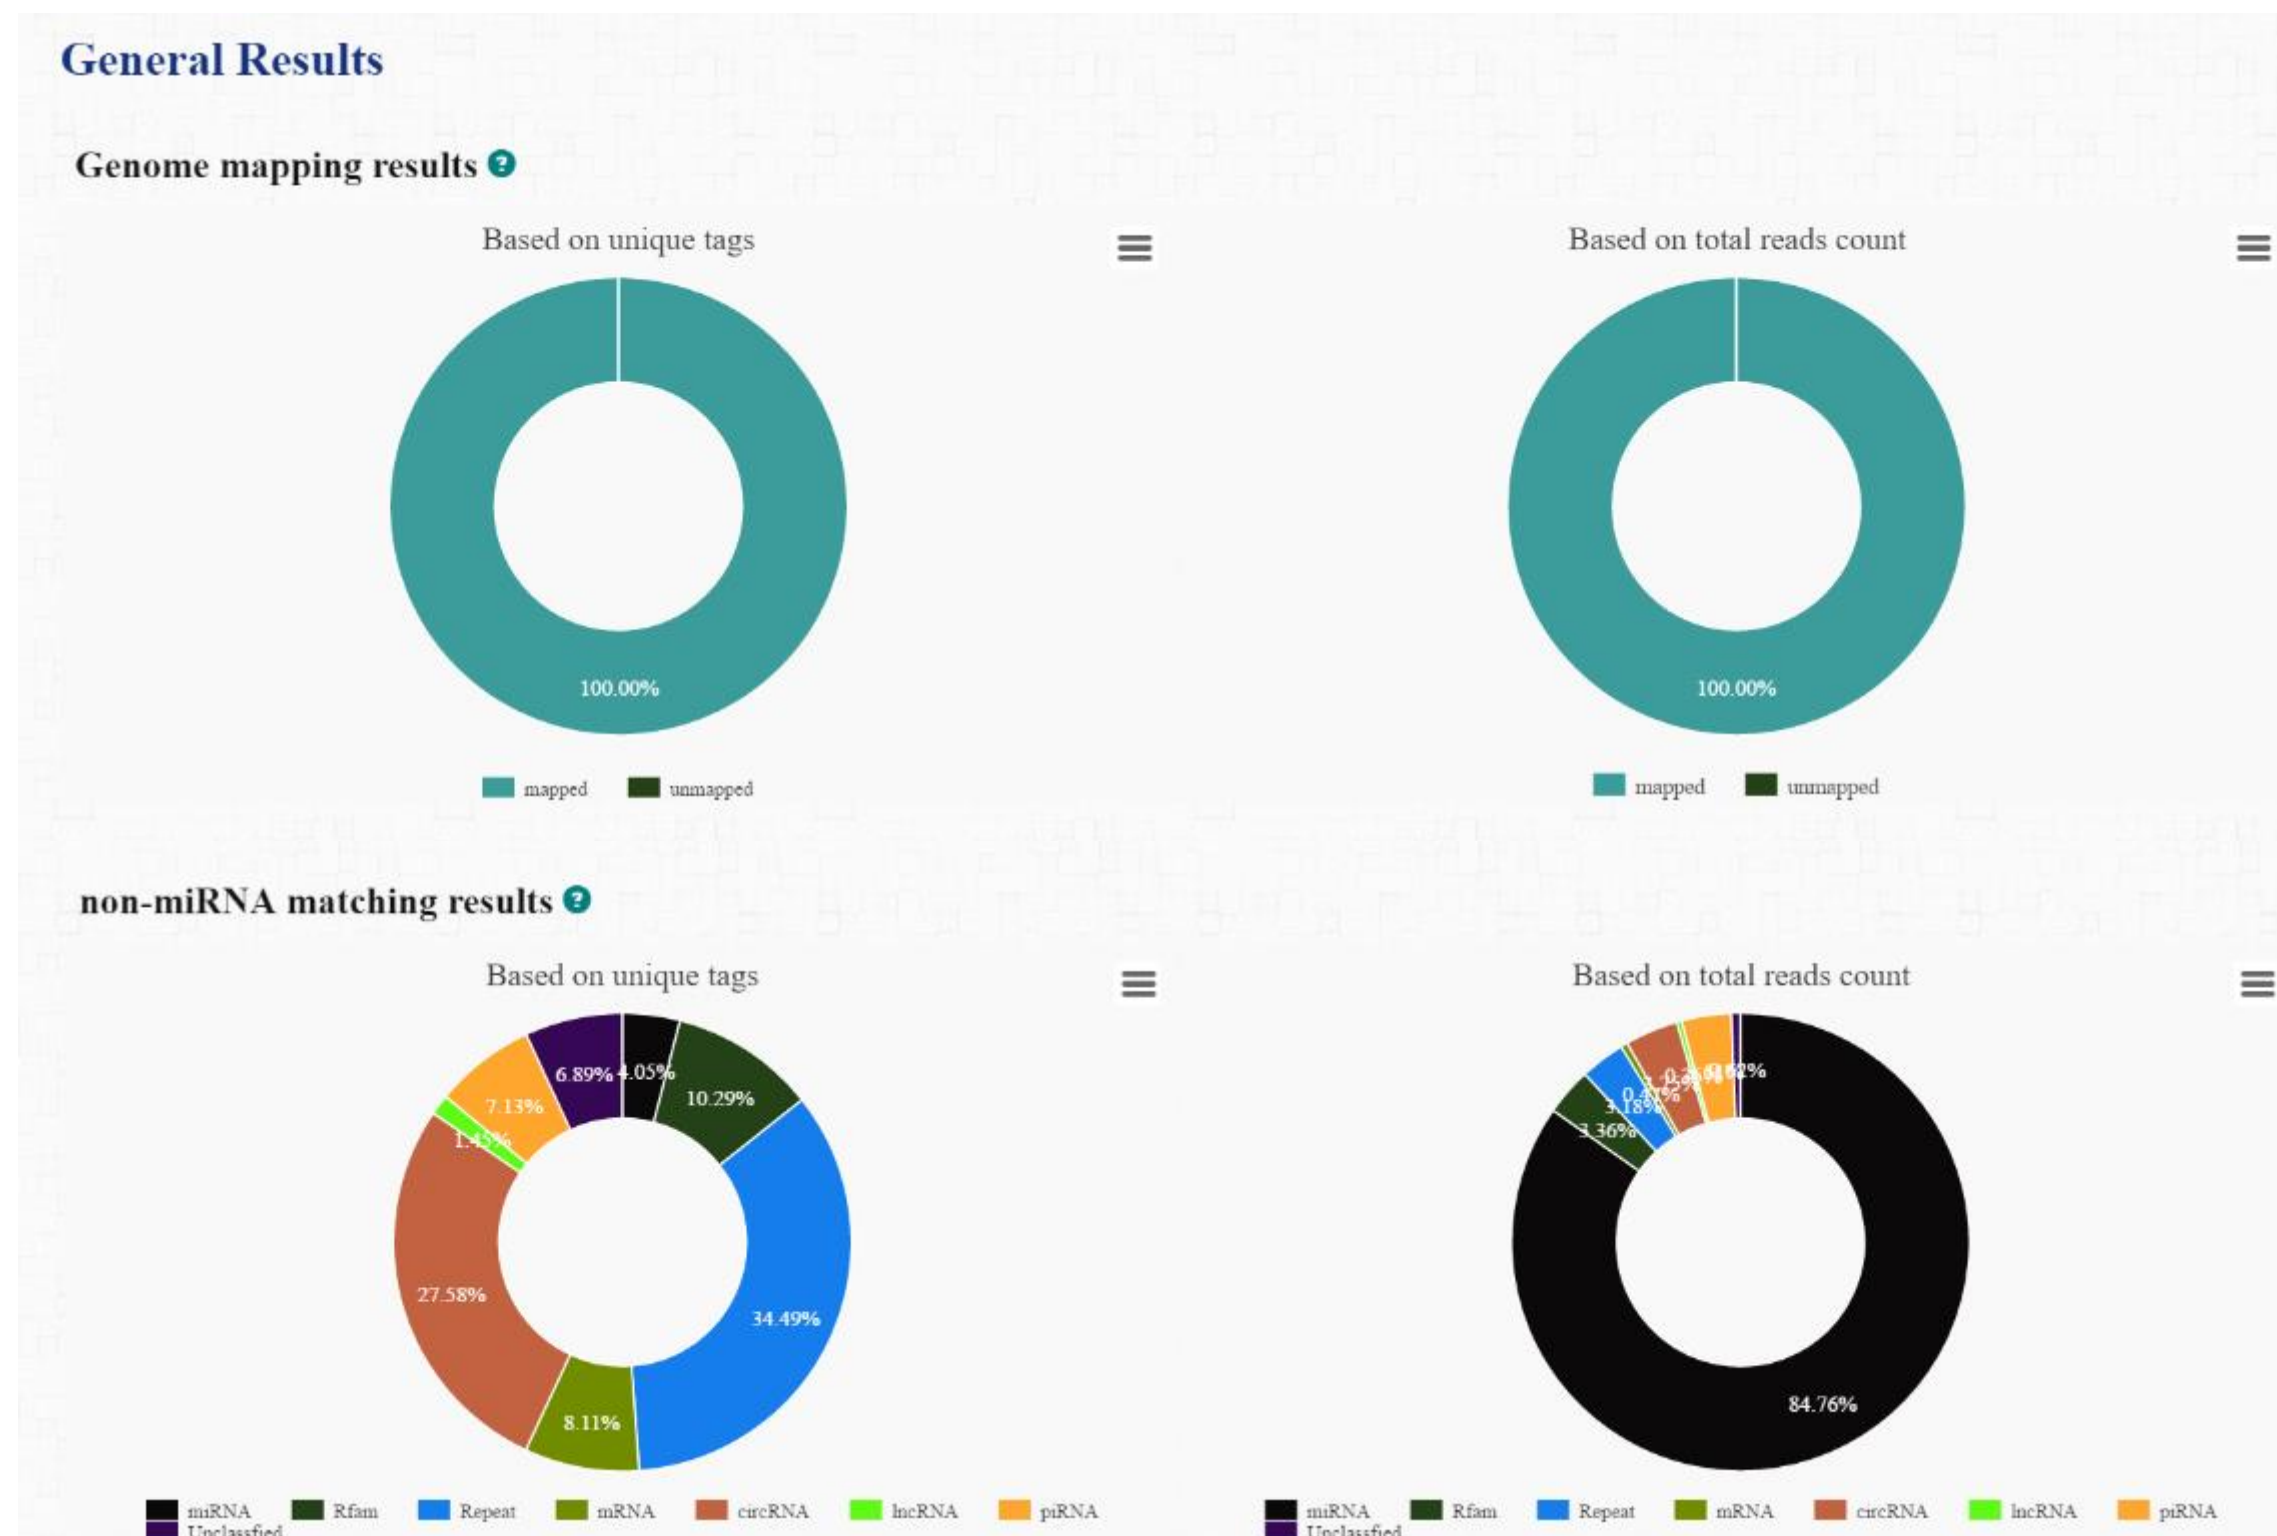

**E**

**Details of expression**

There are 724 known miRNAs. Click [HERE](#) to view detail.  
There are 1076 piRNAs. Click [HERE](#) to view detail.  
There are 1913 rRNAs. Click [HERE](#) to view detail.  
There are 397 snRNAs. Click [HERE](#) to view detail.  
There are 1287 snoRNAs. Click [HERE](#) to view detail.  
There are 2053 circRNAs. Click [HERE](#) to view detail.  
There are 48 lncRNAs. Click [HERE](#) to view detail.

The detail expression of known miRNAs

| NO. | miRNA name      | Absolute count | Relative count    | miRNA sequence         | Most abundant tag ID | Absolute count | Relative count    | Tag       |
|-----|-----------------|----------------|-------------------|------------------------|----------------------|----------------|-------------------|-----------|
| 1   | mmu-let-7a1-3p  | 18             | 7.2008218259043   | CTATACAATCTACTGCTCTTCC | t0001166_17          | 17             | 6.80477150577985  | CTATACAAT |
| 2   | mmu-let-7a-3p   | 217592         | 87097.870282676   | TGAGGTAGTAGGTTGTATAGTT | t0000650_1465718     | 165718         | 66333.7131996956  | TGAGGTAGT |
| 3   | mmu-let-7b-3p   | 2              | 0.800561353621159 | CTATACAACCTACTGCCTCC   | t0008198_2           | 2              | 0.800561353621159 | CTATACAAC |
| 4   | mmu-let-7b-5p   | 7009           | 2805.56726376355  | TGAGGTAGTAGGTTGTGGTT   | t0000509_2990        | 2990           | 1196.8322366363   | TGAGGTAGT |
| 5   | mmu-let-7c-2-3p | 3              | 1.20084203043174  | CTATACAATCTACTGCTCTTCC | t0123991_1           | 1              | 0.40028067681058  | CTATACAAT |
| 6   | mmu-let-7c-3p   | 20207          | 8088.47163631138  | TGAGGTAGTAGGTTGTATAGTT | t0000667_12801       | 12801          | 5123.99294385223  | TGAGGTAGT |
| 7   | mmu-let-7d-3p   | 163            | 65.2457503201245  | CTATACACCTGCTGCCTTCT   | t0001039_91          | 91             | 36.4285415897827  | CTATACACC |
| 8   | mmu-let-7d-5p   | 71082          | 28452.7510699496  | AGAGGTAGTAGGTTGCATAGTT | t0000826_54238       | 54238          | 21710.4233468522  | AGAGGTAGT |
| 9   | mmu-let-7e-5p   | 852            | 341.039136642614  | TGAGGTAGTAGGTTGTATAGTT | t0000024_671         | 671            | 268.589334139899  | TGAGGTAGG |
| 10  | mmu-let-7f1-3p  | 34             | 13.6095430115597  | CTATACAATCTACTGCCTCC   | t0000119_27          | 27             | 10.8075782738856  | CTATACAAT |

**F**

**novel miRNA prediction results**

There are 7 novel miRNAs. Click [HERE](#) to view detail.

The detail expression of novel miRNAs. Click images to view larger version.

| Precursor | MFE          | Sequence                 | ID           | Mature-5p             | Sequence | Counts | ID | Mature-3p | Sequence | Counts | Structure |
|-----------|--------------|--------------------------|--------------|-----------------------|----------|--------|----|-----------|----------|--------|-----------|
| 44763>    | 77(kcal/mol) | AGGACTTGGTCTGGACTACTCT   | xxx-mi002-5p | UUCGGGATCTACTAGAGCATG | 23       |        |    |           |          |        |           |
| 137189>   | 82(kcal/mol) | CCCTTGGAGTTCCTGGGAGGGG   |              |                       |          |        |    |           |          |        |           |
| 304473>   | 90(kcal/mol) | GTCATTACGAGCAGCAGTAGGGGT |              |                       |          |        |    |           |          |        |           |
| 63981>    | 77(kcal/mol) | CTGGATCAGATGCTGCTTTGGG   |              |                       |          |        |    |           |          |        |           |
| 57237>    | 87(kcal/mol) | GTCATTACGAGCAGTATGATCC   |              |                       |          |        |    |           |          |        |           |

**G**

**miRNA target prediction results**

There are 3081 known miRNA predicted targets (Based on most abundant tags). Click [HERE](#) to view detail.  
There are 2946 known miRNA predicted targets (Based on total reads count). Click [HERE](#) to view detail.  
There are 3873 novel miRNA predicted targets. Click [HERE](#) to view detail.

Predicted targets of top abundant known miRNAs (Based on most abundant unique tags).

| miRNA name    | Target symbol | Total Score | Total Energy | Max Score | Max Energy | Strand | Len1 | Len2   | Positions |
|---------------|---------------|-------------|--------------|-----------|------------|--------|------|--------|-----------|
| mmu-let-7f-5p | Rdx           | 164.00      | -20.71       | 164.00    | -20.71     | 97     | 22   | 2258   | 962       |
| mmu-let-7f-5p | Sra1          | 159.00      | -21.79       | 159.00    | -21.79     | 261    | 22   | 279    | 213       |
| mmu-let-7f-5p | Tmed5         | 155.00      | -20.39       | 155.00    | -20.39     | 297    | 22   | 2914   | 1704      |
| mmu-let-7f-5p | Wnt2          | 162.00      | -20.53       | 162.00    | -20.53     | 633    | 22   | 3296   | 2228      |
| mmu-let-7f-5p | Sod2          | 142.00      | -21.74       | 142.00    | -21.74     | 800    | 22   | 2948   | 568       |
| mmu-let-7f-5p | Il13          | 170.00      | -25.63       | 170.00    | -25.63     | 1166   | 22   | 741    | 434       |
| mmu-let-7f-5p | Rrm2          | 149.00      | -21.44       | 149.00    | -21.44     | 1224   | 22   | 914    | 115       |
| mmu-let-7f-5p | Mpp2          | 168.00      | -21.08       | 168.00    | -21.08     | 1456   | 22   | 2302   | 1942      |
| mmu-let-7f-5p | D10Wsn102e    | 161.00      | -20.98       | 161.00    | -20.98     | 1546   | 22   | 122583 | 107223    |
| mmu-let-7f-5p | Haver2        | 156.00      | -22.19       | 156.00    | -22.19     | 1651   | 22   | 1809   | 967       |

**H**

**GO & Pathway analysis results**

**GO analysis**

Predicted targets of top abundant known miRNAs (Based on most abundant tags) are annotated by 5879 GO terms. Click [HERE](#) to view detail.  
Predicted targets of top abundant known miRNAs (Based on total reads count) are annotated by 5791 GO terms. Click [HERE](#) to view detail.  
Predicted targets of top abundant novel miRNAs are annotated by 6363 GO terms. Click [HERE](#) to view detail.

**Pathway analysis**

Predicted targets of top abundant known miRNAs (Based on most abundant tags) are annotated by 493 Pathway terms. Click [HERE](#) to view detail.  
Predicted targets of top abundant known miRNAs (Based on total reads count) are annotated by 494 Pathway terms. Click [HERE](#) to view detail.  
Predicted targets of top abundant novel miRNAs are annotated by 482 Pathway terms. Click [HERE](#) to view detail.

**Protein Domains analysis**

Predicted targets of top abundant known miRNAs (Based on most abundant tags) are annotated by 8639 Protein Domains terms. Click [HERE](#) to view detail.  
Predicted targets of top abundant known miRNAs (Based on total reads count) are annotated by 8470 Protein Domains terms. Click [HERE](#) to view detail.  
Predicted targets of top abundant novel miRNAs are annotated by 9902 Protein Domains terms. Click [HERE](#) to view detail.

Protein Domains analysis for predicted targets of the most abundant known miRNAs (Based on most abundant unique tags).

| Gene symbol                                                                                                                  | Enrichment fold   | P value            | Bonferroni |
|------------------------------------------------------------------------------------------------------------------------------|-------------------|--------------------|------------|
| Kremen1 Kremen2                                                                                                              | 0.912519881845035 | 1                  | 1          |
| Chd4                                                                                                                         | 3.4219495691888   | 0.271014115974375  | 1          |
| Cc2d1b Cpeb5 Hecw2 Nedd4 Nedd4l Plcl1 Prkcg Rubl1Igf5 Rasl3 Rims4 Rgrip1 Smarfl Syt11 Syt12 Syt14 Syt15 Syt2 Syt6 Syt7 Uvrag | 1.3826058815839   | 0.117329086232555  | 1          |
| Ctcf Ctcf1                                                                                                                   | 0.595121662072849 | 0.56429820655591   | 1          |
| Arnt2 Clock Fkbp1 Per2                                                                                                       | 3.04173293948345  | 0.0312055401958974 | 1          |
| Fcib                                                                                                                         | 3.4219495691888   | 0.271014115974375  | 1          |
| Sort1                                                                                                                        | 1.14064985230629  | 1                  | 1          |

**I**

**Protein-protein interaction (PPI) results**

There are 133362 filtered PPIs within predicted targets of the most abundant known miRNAs (Based on most abundant unique tags). Click [HERE](#) to view detail network.

There are 131690 filtered PPIs within predicted targets of the most abundant known miRNAs (Based on total reads count). Click [HERE](#) to view detail network.

There are 166204 filtered PPIs within predicted targets of the most abundant novel miRNAs. Click [HERE](#) to view detail network.

Protein-protein interaction (PPI) analysis for predicted targets of the most abundant novel miRNAs.

| Protein1 | Protein2 | Neighborhood | Fusion | Cooccurrence | Coexpression | Experimental | Database | Textmining | Combined score |
|----------|----------|--------------|--------|--------------|--------------|--------------|----------|------------|----------------|
| Rrm2b    | Rrm1     | 454          | 0      | 526          | 780          | 756          | 900      | 882        | 999            |
| Akt1     | Cdkn1b   | 0            | 0      | 0            | 0            | 756          | 954      | 978        | 999            |
| Akt1     | Pten     | 0            | 0      | 0            | 77           | 752          | 800      | 992        | 999            |
| Akt1     | Mdm2     | 0            | 0      | 0            | 0            | 955          | 961      | 745        | 999            |
| Akt1     | Hsp90a1  | 0            | 0      | 0            | 0            | 843          | 954      | 988        | 999            |
| Akt1     | Gak3b    | 0            | 0      | 0            | 0            | 970          | 954      | 359        | 999            |
| Akt1     | Cdkn1a   | 0            | 0      | 0            | 0            | 632          | 954      | 964        | 999            |
| Akt1     | Hsp90ab1 | 0            | 0      | 0            | 0            | 682          | 908      | 988        | 999            |
| Akt1     | Casp9    | 0            | 0      | 0            | 0            | 165          | 961      | 972        | 999            |
| Akt1     | Nos3     | 0            | 0      | 0            | 0            | 918          | 961      | 979        | 999            |

**J**

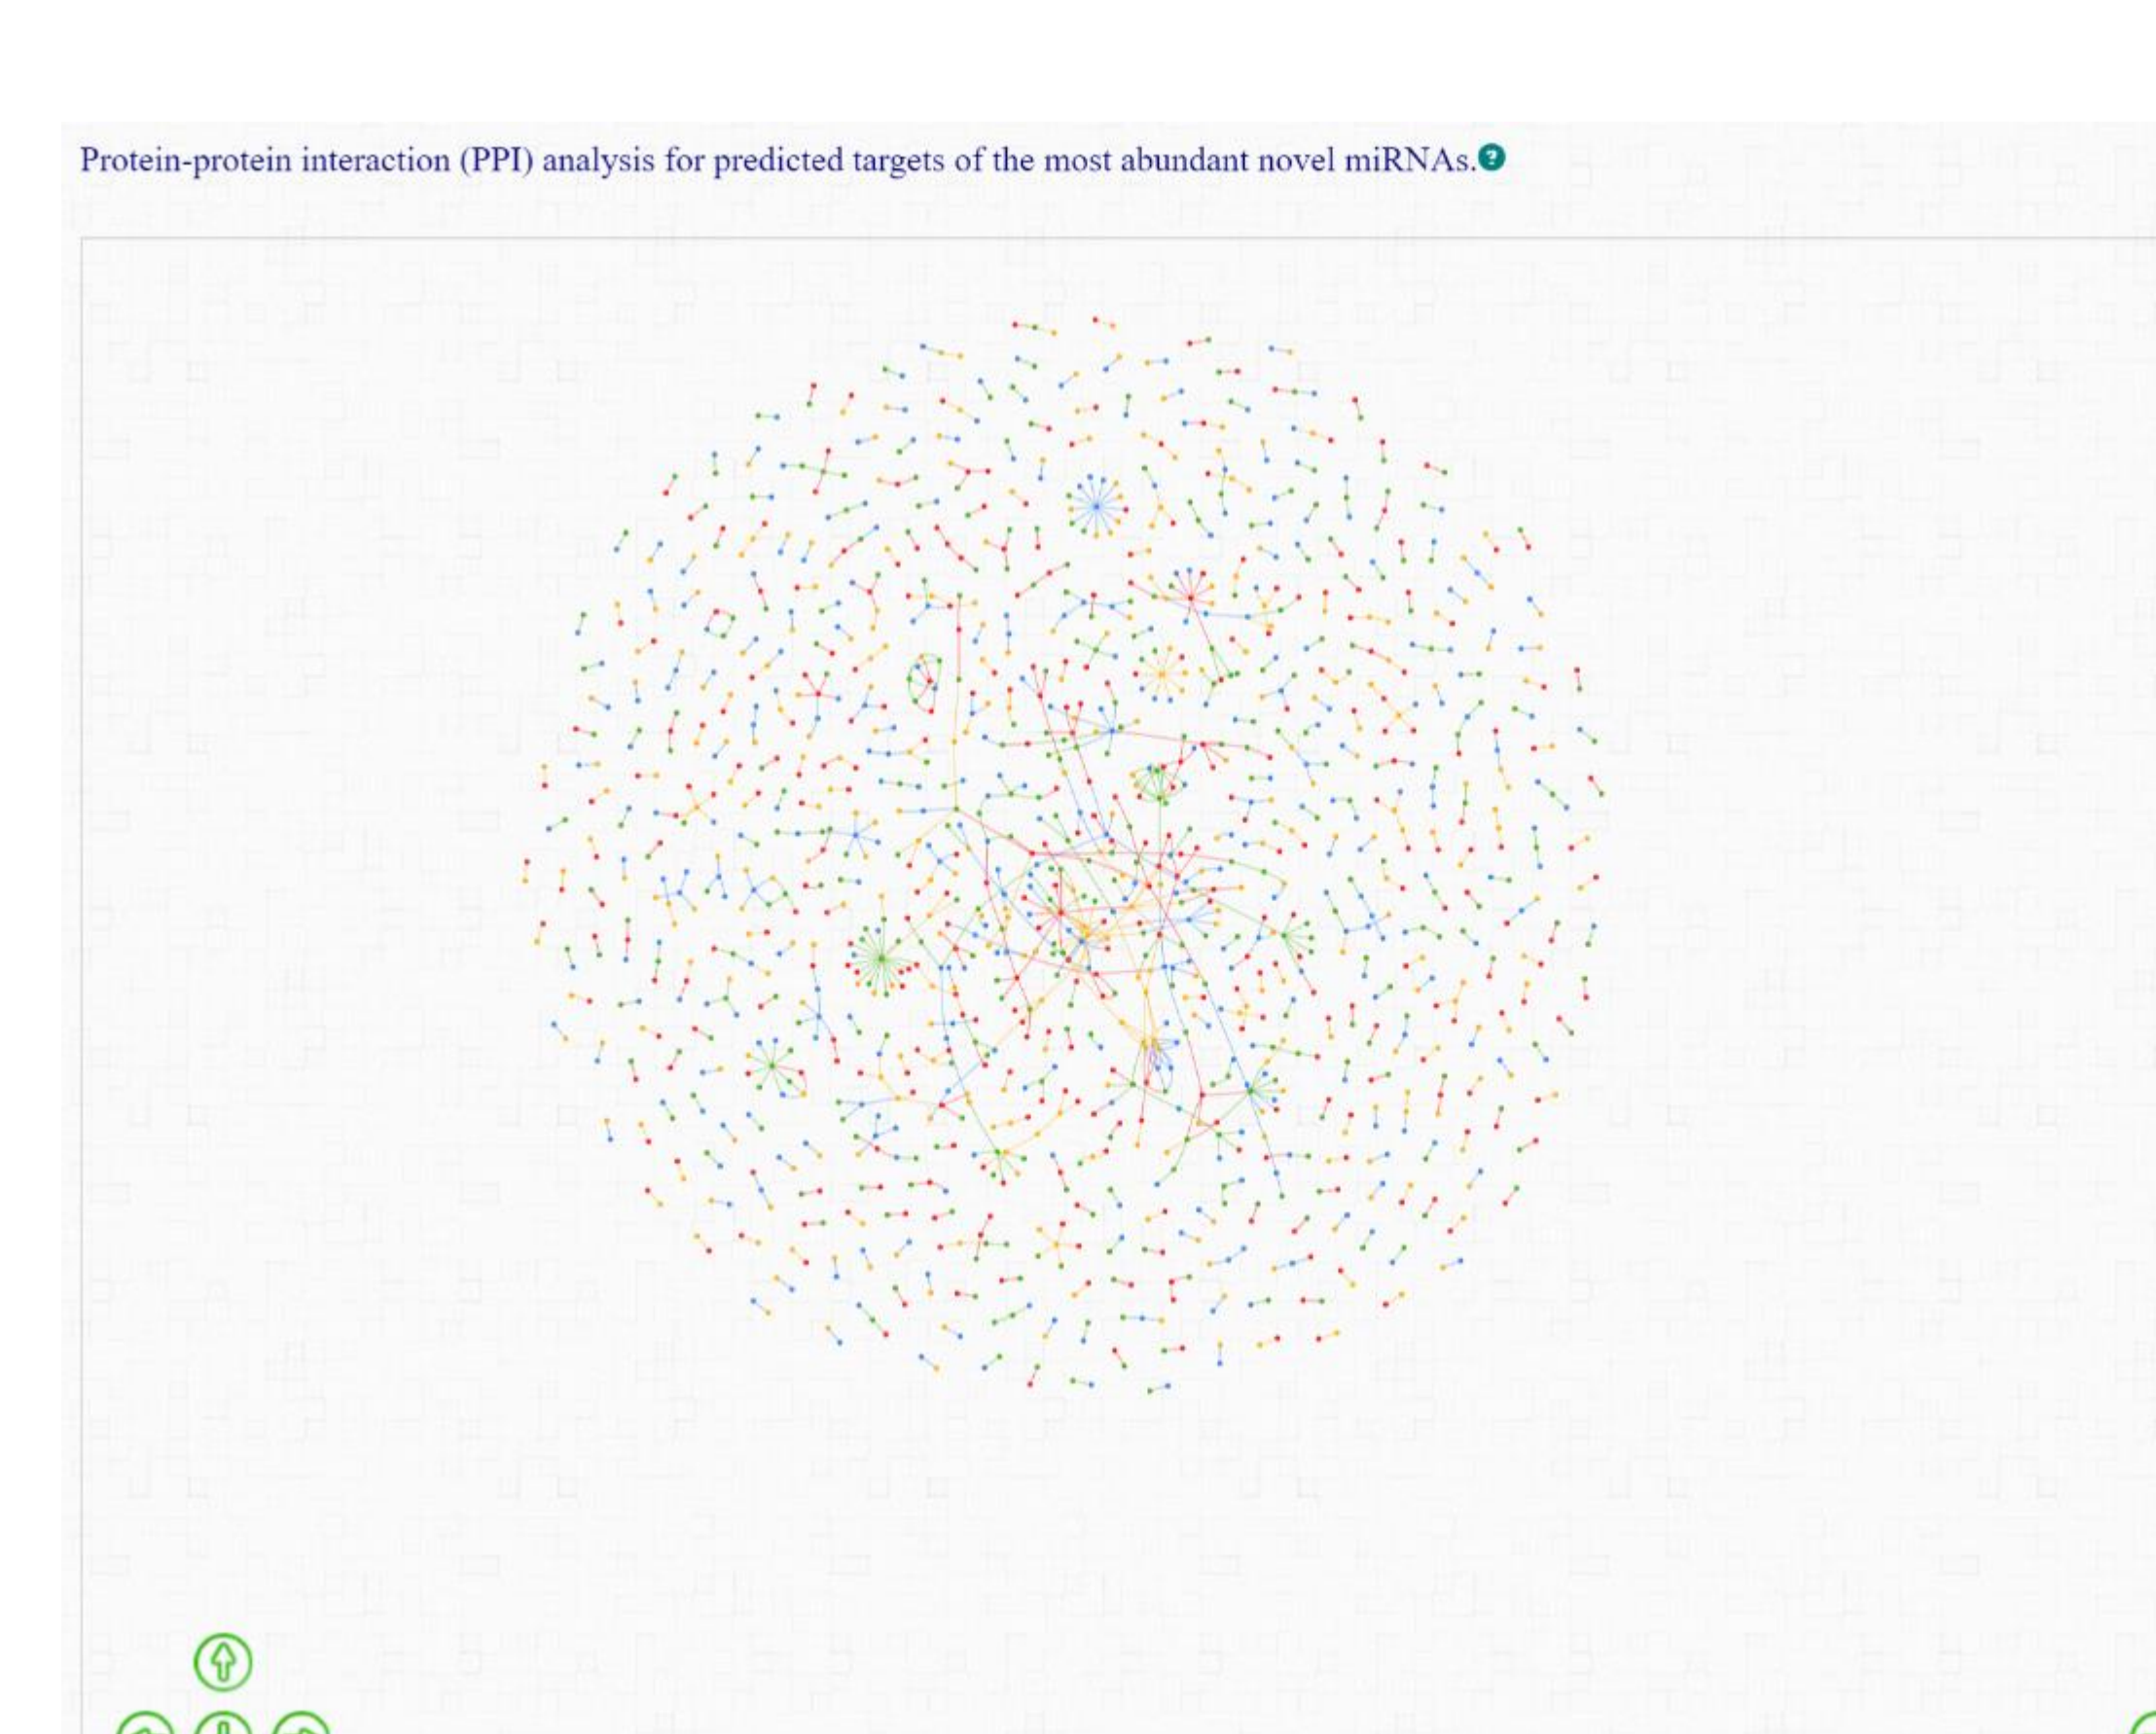

Supplement: btx066_supplementary_figure_2.pdf [file btx066_supplementary_figure_2.pdf]
