# Supplementary material for: CPSS 2.0: a computational platform update for the analysis of small RNA sequencing data
Source: PubMed Central journal article supplement — Bioinformatics. 2017 Feb 8;33(20):3289–91. doi: 10.1093/bioinformatics/btx066 (PMC5860027; doi:10.1093/bioinformatics/btx066), 2017-02-08

# Supplementary Figure 3

## A

### Parameters for Multiple Samples

Please enter your email (Optional)

Multiple samples upload

Sample1

Sample2

Species selection   
 Homo sapiens

Parameters for genome mapping tool Bowtie   
 N: Maximum mismatch 0-3    
 L: Length of fully matched 6-30

Parameters for references matching tools   
 Bowtie   
 N: Maximum mismatch 0-3    
 L: Length of fully matched 6-30    
 BlastN   
 e: Blast e-value

Apply samples difference test  Apply groups difference test

Samples difference test   
 Sample1 vs Sample2   
 Parameters for samples difference test   
 miRNA: P value (<):  Fold change (>):    
 piRNA: P value (<):  Fold change (>):    
 Rfam: P value (<):  Fold change (>):    
 circRNA: P value (<):  Fold change (>):    
 lncRNA: P value (<):  Fold change (>):

Groups difference test   
 Group 1:  Sample1  Sample2   
 Group 2:  Sample1  Sample2   
 Parameters for groups difference test   
 miRNA: P value (<):  Fold change (>):    
 piRNA: P value (<):  Fold change (>):    
 Rfam: P value (<):  Fold change (>):    
 circRNA: P value (<):  Fold change (>):    
 lncRNA: P value (<):  Fold change (>):

Parameters for miRNA target prediction   
 miRanda   
 Energy (<): Minimal free energy (MFE)    
 Score (>):

Parameters for GO and Pathway   
 P value (<): The threshold for hypergeometric test    
 Enrichment fold (>):

Parameter for protein-protein interaction   
 String score (>):

## B

### Samples difference test results

#### Differently expressed miRNA

There are **470** differently expressed miRNAs in Sample1 vs Sample2 (Based on most abundant tags). Click [HERE](#) to view detail. [Figure](#)  
 There are **470** differently expressed miRNAs in Sample1 vs Sample2 (Based on total reads count). Click [HERE](#) to view detail. [Figure](#)

There are **464** differently expressed miRNAs in Sample3 vs Sample4 (Based on most abundant tags). Click [HERE](#) to view detail. [Figure](#)  
 There are **464** differently expressed miRNAs in Sample3 vs Sample4 (Based on total reads count). Click [HERE](#) to view detail. [Figure](#)

#### Differently expressed piRNA

There are **229** differently expressed piRNAs in Sample1 vs Sample2 (Based on most abundant tags). Click [HERE](#) to view detail. [Figure](#)  
 There are **229** differently expressed piRNAs in Sample1 vs Sample2 (Based on total reads count). Click [HERE](#) to view detail. [Figure](#)

There are **244** differently expressed piRNAs in Sample3 vs Sample4 (Based on most abundant tags). Click [HERE](#) to view detail. [Figure](#)  
 There are **244** differently expressed piRNAs in Sample3 vs Sample4 (Based on total reads count). Click [HERE](#) to view detail. [Figure](#)

#### Differently expressed rRNA

There are **150** differently expressed rRNAs in Sample1 vs Sample2 (Based on most abundant tags). Click [HERE](#) to view detail. [Figure](#)  
 There are **150** differently expressed rRNAs in Sample1 vs Sample2 (Based on total reads count). Click [HERE](#) to view detail. [Figure](#)

There are **139** differently expressed rRNAs in Sample3 vs Sample4 (Based on most abundant tags). Click [HERE](#) to view detail. [Figure](#)  
 There are **139** differently expressed rRNAs in Sample3 vs Sample4 (Based on total reads count). Click [HERE](#) to view detail. [Figure](#)

#### Differently expressed snRNA

There are **2** differently expressed snRNAs in Sample1 vs Sample2 (Based on most abundant tags). Click [HERE](#) to view detail. [Figure](#)  
 There are **2** differently expressed snRNAs in Sample1 vs Sample2 (Based on total reads count). Click [HERE](#) to view detail. [Figure](#)

There are **5** differently expressed snRNAs in Sample3 vs Sample4 (Based on most abundant tags). Click [HERE](#) to view detail. [Figure](#)  
 There are **5** differently expressed snRNAs in Sample3 vs Sample4 (Based on total reads count). Click [HERE](#) to view detail. [Figure](#)

#### Differently expressed snoRNA

There are **175** differently expressed snoRNAs in Sample1 vs Sample2 (Based on most abundant tags). Click [HERE](#) to view detail. [Figure](#)  
 There are **175** differently expressed snoRNAs in Sample1 vs Sample2 (Based on total reads count). Click [HERE](#) to view detail. [Figure](#)

There are **171** differently expressed snoRNAs in Sample3 vs Sample4 (Based on most abundant tags). Click [HERE](#) to view detail. [Figure](#)  
 There are **171** differently expressed snoRNAs in Sample3 vs Sample4 (Based on total reads count). Click [HERE](#) to view detail. [Figure](#)

#### Differently expressed circRNA

There are **1100** differently expressed circRNAs in Sample1 vs Sample2 (Based on most abundant tags). Click [HERE](#) to view detail. [Figure](#)  
 There are **1100** differently expressed circRNAs in Sample1 vs Sample2 (Based on total reads count). Click [HERE](#) to view detail. [Figure](#)

There are **1037** differently expressed circRNAs in Sample3 vs Sample4 (Based on most abundant tags). Click [HERE](#) to view detail. [Figure](#)  
 There are **1037** differently expressed circRNAs in Sample3 vs Sample4 (Based on total reads count). Click [HERE](#) to view detail. [Figure](#)

#### Differently expressed lncRNA

There are **2** differently expressed lncRNAs in Sample1 vs Sample2 (Based on most abundant tags). Click [HERE](#) to view detail. [Figure](#)  
 There are **2** differently expressed lncRNAs in Sample1 vs Sample2 (Based on total reads count). Click [HERE](#) to view detail. [Figure](#)

There are **4** differently expressed lncRNAs in Sample3 vs Sample4 (Based on most abundant tags). Click [HERE](#) to view detail. [Figure](#)  
 There are **4** differently expressed lncRNAs in Sample3 vs Sample4 (Based on total reads count). Click [HERE](#) to view detail. [Figure](#)

## D

### Differentially expressed miRNAs (Based on most abundant unique tags)

Show 10 entries

| miRNA name    | Count   |         | Total   |         | RPM              |                  | Fold change      | P value              | Trend | Sig |
|---------------|---------|---------|---------|---------|------------------|------------------|------------------|----------------------|-------|-----|
|               | Sample1 | Sample2 | Sample1 | Sample2 | Sample1          | Sample2          |                  |                      |       |     |
| hsa-miR-151b  | 140     | 3       | 493523  | 514042  | 283.674722353365 | 5.8360989958019  | 48.6069072093229 | 3.27456738765317e-31 | -     | *   |
| hsa-miR-378c  | 19      | 0       | 493523  | 514042  | 38.4987123193853 | 0                | Inf              | 2.45206932023677e-05 | -     | *   |
| hsa-let-7a-3p | 8       | 6       | 493523  | 514042  | 16.209984134478  | 11.6721979916038 | 1.3887687740923  | 0.731197144821912    | -     |     |
| hsa-let-7a-5p | 8868    | 9391    | 493523  | 514042  | 17968.7674130689 | 18268.9352231919 | 1.01670497498369 | 0.26200053032374     | +     |     |
| hsa-let-7b-3p | 5       | 3       | 493523  | 514042  | 10.1312400840488 | 5.8360989958019  | 1.73596097176153 | 0.680895786635199    | -     |     |
| hsa-let-7b-5p | 1900    | 2269    | 493523  | 514042  | 3849.87123193853 | 4414.03620715817 | 1.14654125845543 | 1.1101411044135e-05  | +     |     |
| hsa-let-7c-3p | 2       | 3       | 493523  | 514042  | 4.05249603361951 | 5.8360989958019  | 1.44012454235257 | 0.999999999999177    | +     |     |
| hsa-let-7c-5p | 1861    | 2015    | 493523  | 514042  | 3770.84755928295 | 3919.91315884694 | 1.03953105958819 | 0.23318072248522     | +     |     |
| hsa-let-7d-3p | 17      | 14      | 493523  | 514042  | 34.4462162857658 | 27.251286470755  | 1.26477156514054 | 0.636425021873313    | -     |     |
| hsa-let-7d-5p | 678     | 688     | 493523  | 514042  | 1373.79615539701 | 1338.41203637057 | 1.02643738853574 | 0.648780962731757    | -     |     |

Showing 1 to 10 of 470 entries

## E

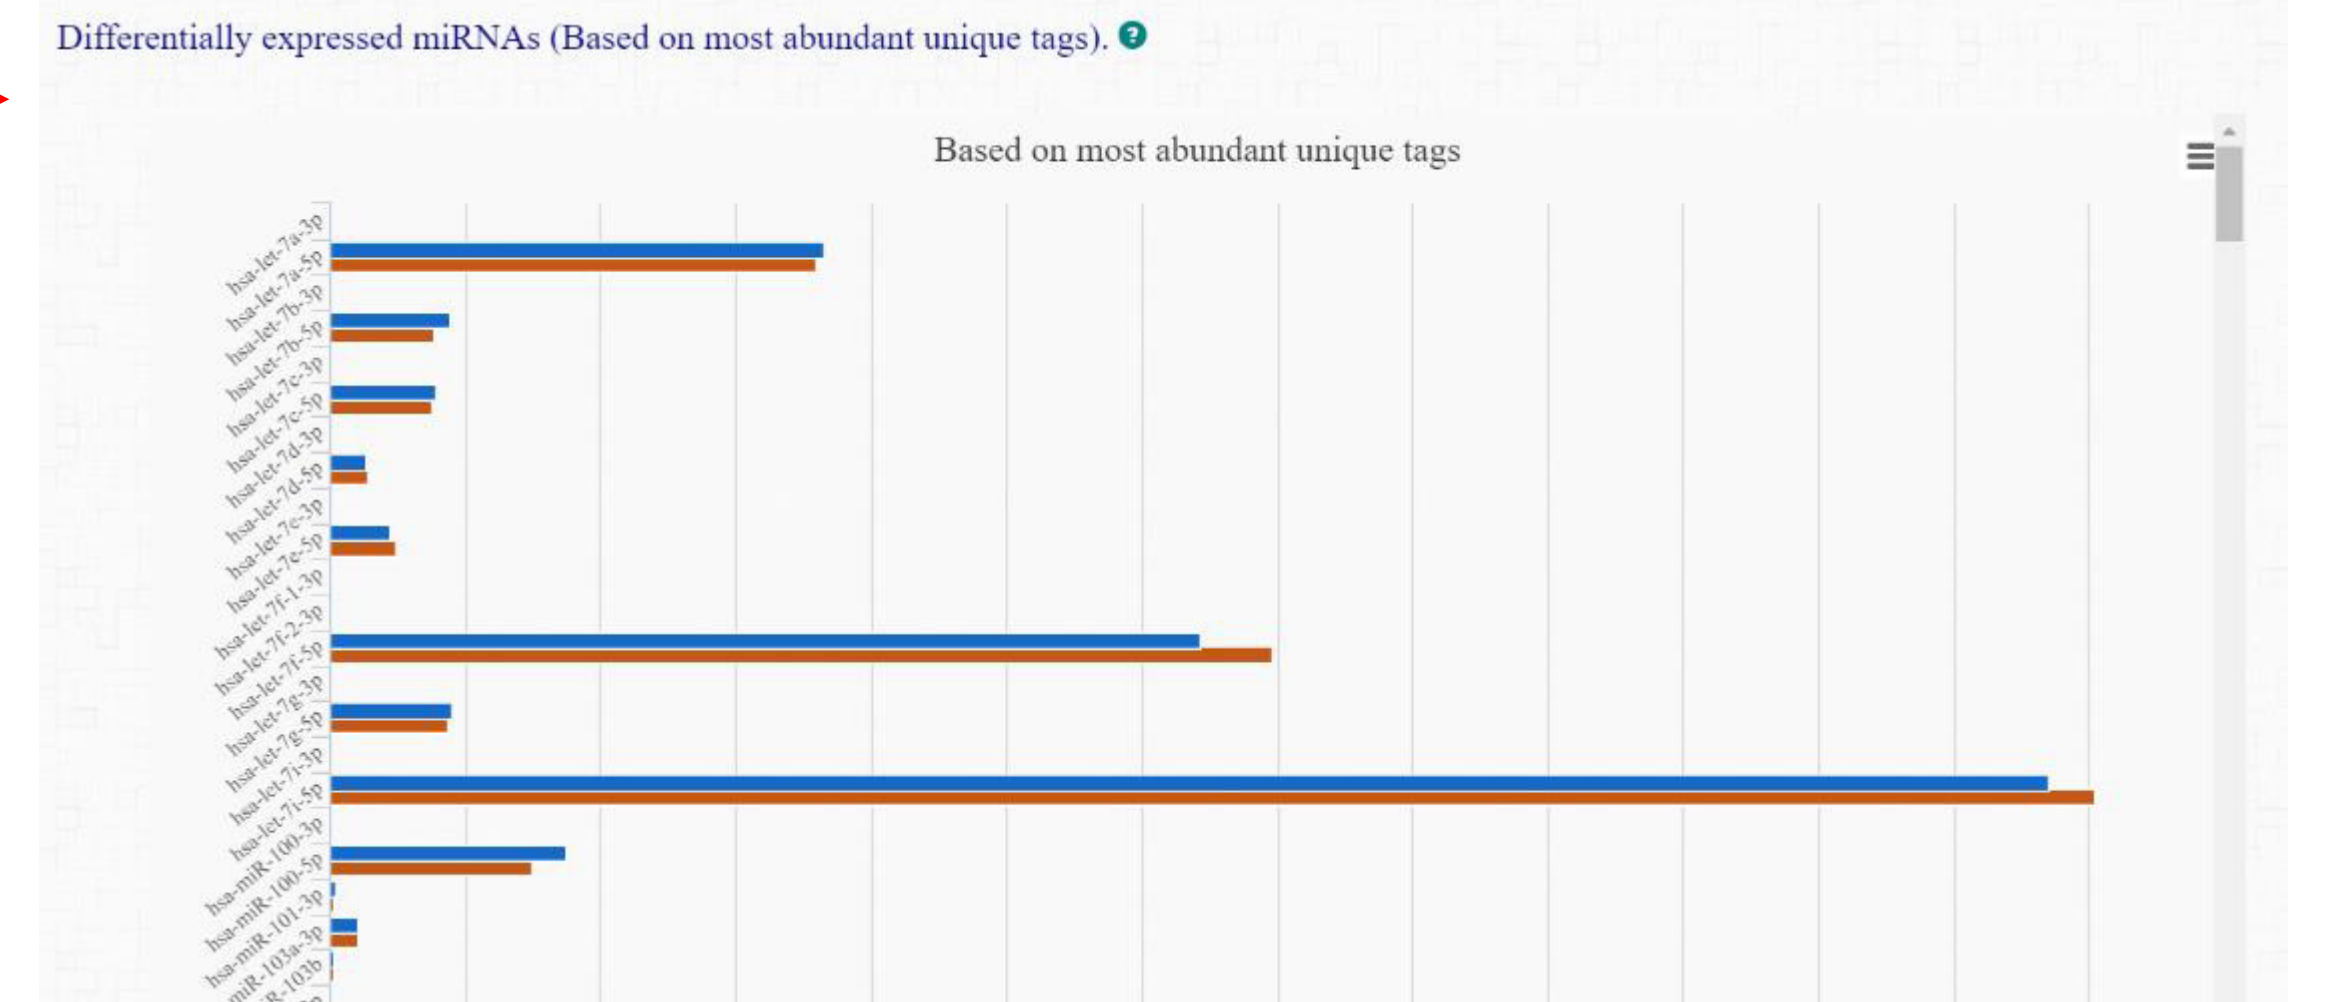

## F

### Differentially expressed miRNAs for groups test difference (Based on most abundant unique tags)

Show 10 entries

|    | RPM              |                  |                  |                  |                  | P value            | Group1 mean      | Group2 mean       | Fold change       | Tendency | Sig |
|----|------------------|------------------|------------------|------------------|------------------|--------------------|------------------|-------------------|-------------------|----------|-----|
|    | Sample6          | Sample7          | Sample8          | Sample9          | Sample10         |                    |                  |                   |                   |          |     |
| 47 | 0                | 0                | 0                | 3.57498440413054 | 0                | 0.329116378879816  | 3.61233022415684 | 0.714996880826108 | 5.05223214398243  | -        |     |
| 65 | 0                | 0                | 0                | 0                | 0                | 0.0815188864122096 | 4.977737015966   | 1.27244540679019  | 3.911194284252492 | -        |     |
| 24 | 18.9931461875329 | 13.5335211786073 | 15.0374432336518 | 14.2999376165221 | 14.8451964125522 | 0.0793650793650795 | 20.0899542553955 | 15.3418489257733  | 1.30948716498217  | -        |     |
| 47 | 21.7064527857519 | 5.41340847144292 | 5.01248107788393 | 8.93746101032634 | 0                | 0.873015873015873  | 8.72420730648795 | 8.21396066908102  | 1.0621194400562   | -        |     |
| 3  | 13.5665329910949 | 5.41340847144292 | 0                | 7.14996880826107 | 8.48296937860129 | 0.873015873015873  | 10.8335061609563 | 6.92257592988004  | 1.56495302770107  | -        |     |
| 12 | 0                | 0                | 0                | 12.5124454144569 | 16.965938752026  | 0.329116378879816  | 14.8172911443795 | 5.8956768343319   | 2.51324683505293  | -        |     |
| 61 | 13.50521226197   | 2419.79358673498 | 2496.2155767862  | 2413.11447278811 | 2525.80413247853 | 0.0793650793650795 | 6855.45503424675 | 3353.68659620996  | 2.04415494339697  | -        |     |
| 17 | 854.69157843898  | 181.349183793338 | 175.436837225938 | 325.32380775879  | 619.256764637894 | 0.357142857142857  | 692.85339872368  | 431.211589074406  | 1.60676431577263  | -        |     |
| 47 | 0                | 0                | 0                | 0                | 0                | 0.0815188864122096 | 5.48797818405066 | 0                 | Inf               | up       | *   |
| 12 | 10.8532263928759 | 0                | 7.5187216168259  | 5.36247660619581 | 4.24148468930064 | 0.357142857142857  | 10.7971477847103 | 5.59518186103965  | 1.9297224027503   | -        |     |

Showing 1 to 10 of 1,182 entries

## G

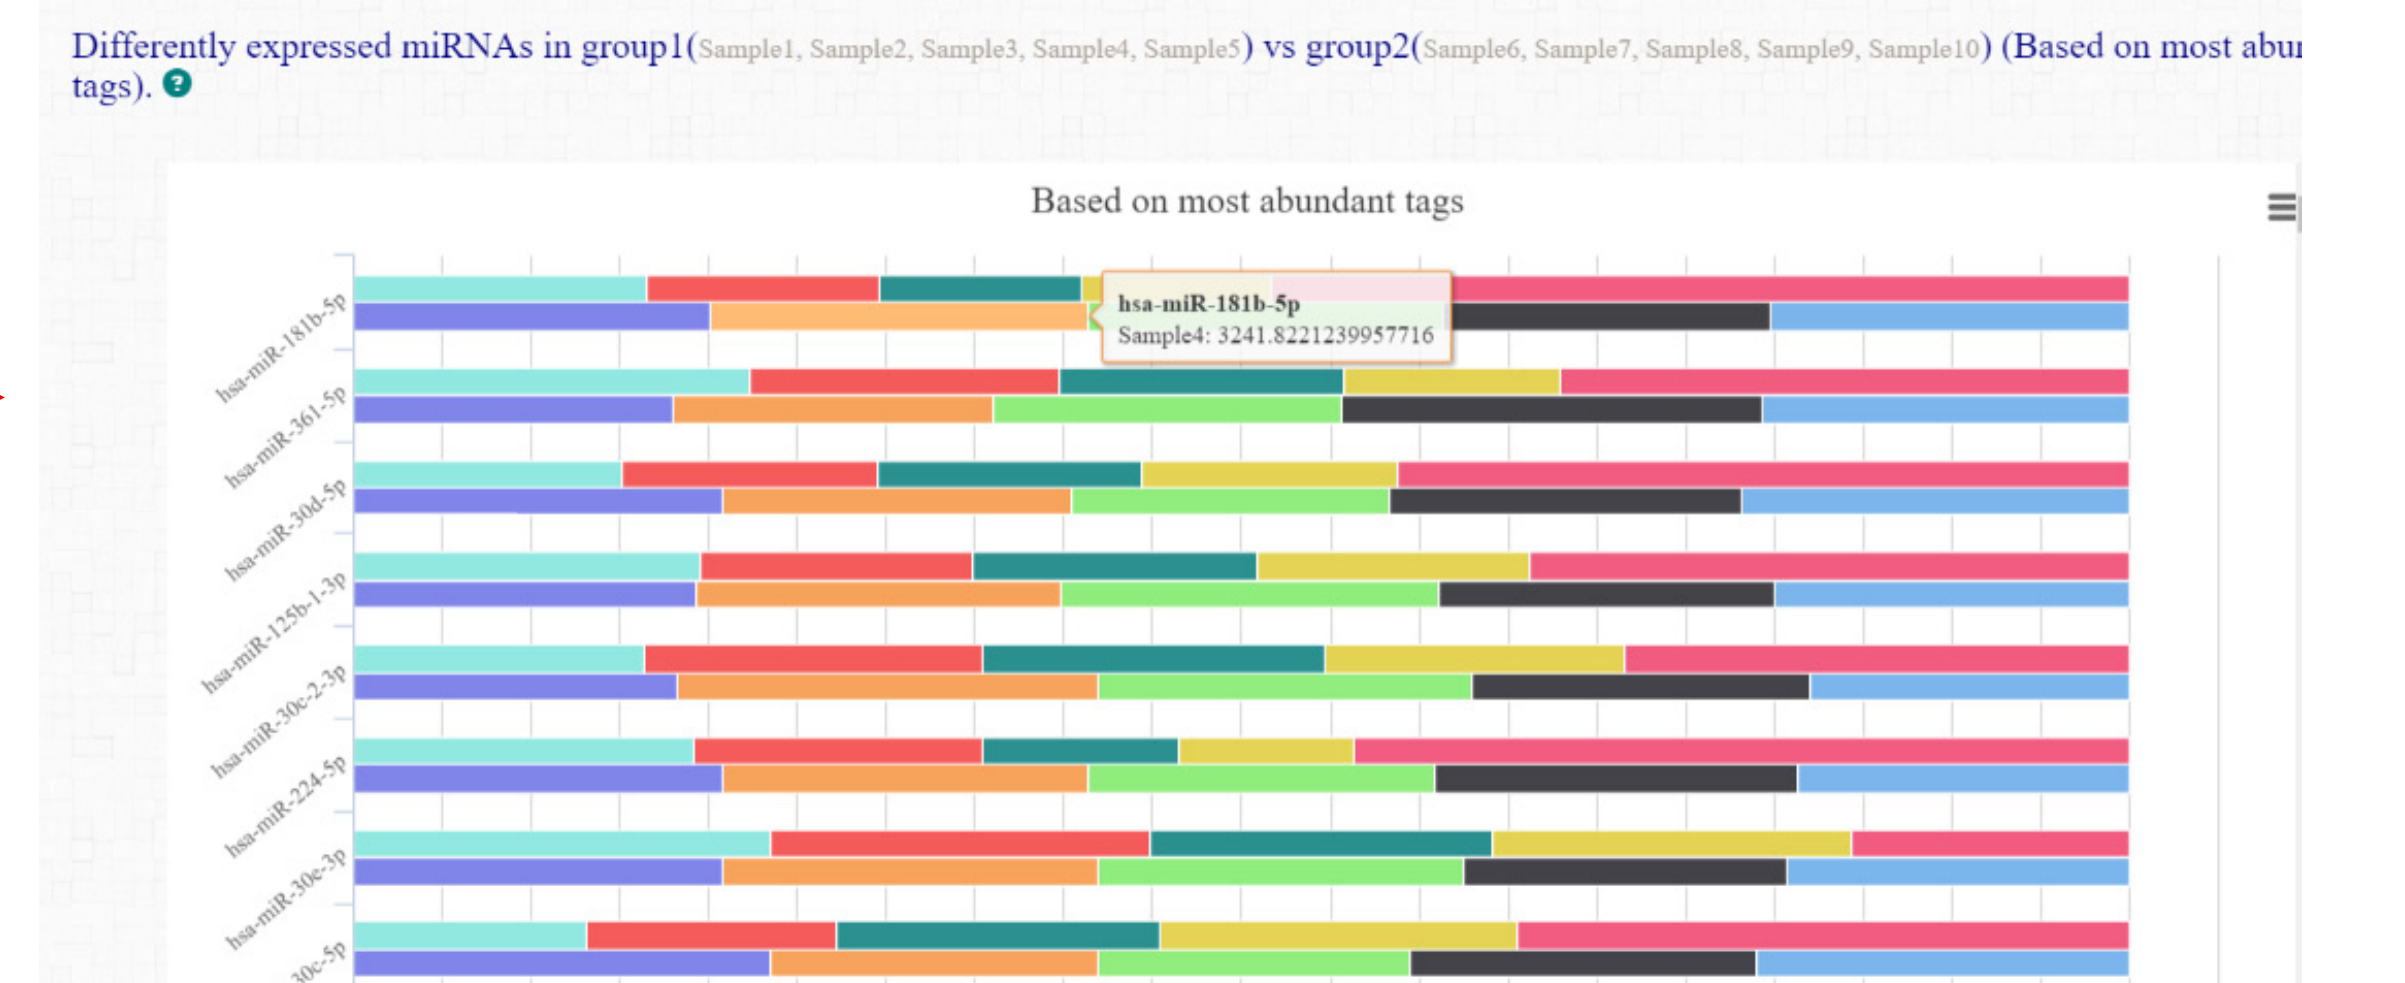

Supplement: btx066_supplementary_figure_3.pdf [file btx066_supplementary_figure_3.pdf]
