# Supplementary material for: CPSS 2.0: a computational platform update for the analysis of small RNA sequencing data
Source: PubMed Central journal article supplement — Bioinformatics. 2017 Feb 8;33(20):3289–91. doi: 10.1093/bioinformatics/btx066 (PMC5860027; doi:10.1093/bioinformatics/btx066), 2017-02-08
Supplement: btx066_supplementary_table_1.pdf [file btx066_supplementary_table_1.pdf]

Supplementary table 1. Comparison of CPSS 2.0 and current sRNA analysis web-servers.

| Terms                                                  | CPSS 2.0                                                                                                                                                                                                                                                                                                                                                                                                                                                                                     | sRNAtoolbox                                                                                                                                                                                         | Oasis                                                                                                                                                                                                               | Chimira                                                                                                                             | MAGI                                                                                                                                                        |
|--------------------------------------------------------|----------------------------------------------------------------------------------------------------------------------------------------------------------------------------------------------------------------------------------------------------------------------------------------------------------------------------------------------------------------------------------------------------------------------------------------------------------------------------------------------|-----------------------------------------------------------------------------------------------------------------------------------------------------------------------------------------------------|---------------------------------------------------------------------------------------------------------------------------------------------------------------------------------------------------------------------|-------------------------------------------------------------------------------------------------------------------------------------|-------------------------------------------------------------------------------------------------------------------------------------------------------------|
| Input format                                           | FASTA or FASTA files compressed in *.tar.gz format                                                                                                                                                                                                                                                                                                                                                                                                                                           | FASTQ, FASTA or read counts file compressed in *.gz format                                                                                                                                          | FASTQ file compressed in *.gz format                                                                                                                                                                                | FASTA or FASTQ files compressed in *.gz format                                                                                      | FASTQ (This server is currently closed. This assessment is based on the available demo data.)                                                               |
| Finish the whole analysis process by single submission | Yes                                                                                                                                                                                                                                                                                                                                                                                                                                                                                          | No (specific submission required for miRNA target prediction, miRNA expression difference, et al.)                                                                                                  | No (specific submission required for sRNA detection, differently expression and classification)                                                                                                                     | Yes                                                                                                                                 | Yes                                                                                                                                                         |
| Species                                                | 48 species in total, including 31 animals ( <i>Homo sapiens</i> , <i>Mus musculus</i> , et al.).                                                                                                                                                                                                                                                                                                                                                                                             | 60 species in total, including 20 animals ( <i>Homo sapiens</i> , <i>Mus musculus</i> , et al.).                                                                                                    | 14 animal species ( <i>Homo sapiens</i> , <i>Mus musculus</i> , et al.).                                                                                                                                            | 180 species including ( <i>Homo sapiens</i> , <i>Mus musculus</i> , et al.).                                                        | <i>Homo sapiens</i>                                                                                                                                         |
| miRNA reference                                        | miRBase (V.21)                                                                                                                                                                                                                                                                                                                                                                                                                                                                               | miRBase (V.21)                                                                                                                                                                                      | miRBase (V.21)                                                                                                                                                                                                      | miRBase (Not mentioned)                                                                                                             | miRBase (Not mentioned)                                                                                                                                     |
| General results                                        | Genome mapping result, Length distribution, Chromosome distribution, miRNA family matching results, statistics results of matched ncRNA and ncRNA matching distribution including miRNA, piRNA, rRNA, snRNA, snoRNA, circRNA and lncRNA.                                                                                                                                                                                                                                                     | Genome mapping result, Length distribution, miRNA matching distribution, isomiR fraction, sRNA matching statistics including piRNA, Repeat, mRNA and tRNA.                                          | FastQC report, Genome mapping result, Length distribution, ncRNA matching result including miRNA, piRNA, snoRNA, snRNA and rRNA                                                                                     | QC plot, miRNA count table and miRNA modification                                                                                   | Base quality, read length, base distribution, GC ratio, statistics of genome mapping and sRNA (miRNA, lincRNA, rRNA, snRNA, snoRNA, tRNA) matching results. |
| Differentially expressed ncRNA                         | miRNA, piRNA, rRNA, snRNA, snoRNA, circRNA and lncRNA differentially expressed detection are conducted on paired and multiple samples.                                                                                                                                                                                                                                                                                                                                                       | miRNA differentially expressed detection is conducted on multiple samples.                                                                                                                          | miRNA, piRNA, rRNA, snRNA, snoRNA differentially expressed detection are conducted on multiple samples                                                                                                              | miRNA differentially expressed detection is conducted on paired multiple samples.                                                   | miRNA differentially expressed detection is conducted on multiple samples.                                                                                  |
| Novel miRNA prediction                                 | Predicted with miReep, strcutre illustration using RNAfold and detailed information including Precursor (ID, Location, Length, MFE and sequence), Mature-5p/3P (sequence and expression count)                                                                                                                                                                                                                                                                                               | This module is not provided in all my tests.                                                                                                                                                        | This module is not provided in all my tests.                                                                                                                                                                        | Not provided                                                                                                                        | Predicted with miRdeep2, detailed information including expression statistics and P value.                                                                  |
| Functional analysis                                    | GO (DAVID 6.7), Pathway (KEGG DAVID 6.7), Protein domain (DAVID 6.7) and Protein-protein interaction (STRING V.10).                                                                                                                                                                                                                                                                                                                                                                          | GO (Annotation-Modules)                                                                                                                                                                             | Submit selected miRNA targets to third-party web based tools to perform functional annotation and enrichment analysis.                                                                                              | Not provided                                                                                                                        | KEGG pathway                                                                                                                                                |
| Visualization                                          | Graphical interface are provided for: 1) status of the job (queue, running or finished); 2) general results; 3) statistic result for each type of sRNA (miRNA, Rfam, Repeat, mRNA, circRNA, lncRNA and piRNA); 4) clustered bar graph illustration of each differently expressed sRNA among paired or multiple samples; 5) novel miRNA prediction results; 6) functional analysis, including GO, Pathway, Protein domain annotation and enrichment analysis; 7) Protein-protein interaction. | Graphical interface are provided for: 1) status of the job (queue, running or finished); 2) general results; 3) heat-map and statistics of miRNA expression; 4) miRNA targets and GO term analysis. | Graphical interface are provided for: 1) general results; 2) multiple sample comparison and detailed information for each sample; 3) miRNA detailed table and specific enrichment analysis; 4) biomarker detection. | Graphical interface are provided for: 1) status of the job (queue, running or finished); 2) general results and miRNA modification. | Graphical interface are provided for: 1) general results; 2) known and novel miRNA statistics; 3) Pathway analysis.                                         |
| Demo case                                              | Four single sample and three multiple samples demo data and results                                                                                                                                                                                                                                                                                                                                                                                                                          | One multiple samples demo data and results                                                                                                                                                          | Three multiple samples demo data and results                                                                                                                                                                        | One multiple samples demo results                                                                                                   | One multiple samples demo data and results                                                                                                                  |
