# Supplementary material for: CPSS 2.0: a computational platform update for the analysis of small RNA sequencing data
Source: PubMed Central journal article supplement — Bioinformatics. 2017 Feb 8;33(20):3289–91. doi: 10.1093/bioinformatics/btx066 (PMC5860027; doi:10.1093/bioinformatics/btx066), 2017-02-08
Supplement: btx066_supplementary_table_2.pdf [file btx066_supplementary_table_2.pdf]

Supplementary table 2. Databases integrated in CPSS 2.0

|                    | Item                                                                                                                                       | Source               | Species                                                                                                                                                                                                                                        |
|--------------------|--------------------------------------------------------------------------------------------------------------------------------------------|----------------------|------------------------------------------------------------------------------------------------------------------------------------------------------------------------------------------------------------------------------------------------|
| Reference sequence | Genome                                                                                                                                     | Eesembl (Release 86) | hsa, mmu, dme, cel, dre, gga, ath, bmo, aca, bdi, eca, gma, oar, osa, ptc, sbi, ola, tgu, tni, ssc, vvi, xtr, aly, bta, cin, cre, ggo, mml, ocu, ptr, ata, atr, bra, mtr, ppe, api, hme, lgi, tca, zma, ame, sly, rno, cfa, aga, pab, stu, tru |
|                    | Precursor                                                                                                                                  | miRBase (21)         | hsa, mmu, dme, cel, dre, gga, ath, bmo, aca, bdi, eca, gma, oar, osa, ptc, sbi, ola, tgu, tni, ssc, vvi, xtr, aly, bta, cin, cre, ggo, mml, ocu, ptr, ata, atr, bra, mtr, ppe, api, hme, lgi, tca, zma, ame, sly, rno, cfa, aga, pab, stu      |
|                    | Mature miRNA                                                                                                                               | miRBase (21)         | hsa, mmu, dme, cel, dre, gga, ath, bmo, aca, bdi, eca, gma, oar, osa, ptc, sbi, ola, tgu, tni, ssc, vvi, xtr, aly, bta, cin, cre, ggo, mml, ocu, ptr, ata, atr, bra, mtr, ppe, api, hme, lgi, tca, zma, ame, sly, rno, cfa, aga, pab, stu      |
|                    | mRNA                                                                                                                                       | Eesembl (Release 86) | hsa, mmu, dme, cel, dre, gga, ath, aca, bdi, eca, gma, oar, osa, ptc, sbi, ola, tgu, tni, ssc, vvi, xtr, aly, bta, cin, cre, ggo, mml, ocu, ptr, ata, tru                                                                                      |
|                    | Repeats                                                                                                                                    | Repeatmasker         | hsa, mmu, dme, cel, ath, bmo, aca, bdi, eca, gma, oar, osa, ptc, sbi, ola, tgu, tni, ssc, vvi, xtr, atr, bra, mtr, ppe, api, hme, lgi, tca, zma, tru                                                                                           |
|                    | piRNA                                                                                                                                      | piRbase              | hsa, mmu, dme, cel, dre, gga, bmo                                                                                                                                                                                                              |
|                    | lncRNA                                                                                                                                     | lncRNAdb             | hsa, mmu, dme, dre, gga, ath, aly, ame                                                                                                                                                                                                         |
|                    | circRNA                                                                                                                                    | circBase             | hsa, mmu                                                                                                                                                                                                                                       |
| Annotation         | GO                                                                                                                                         | DAVID (6.7)          | hsa, mmu, dme, gga, ocu, ath, cel, cin, cre, eca, mml, oar, ola, osa, ptc, ptr, sbi, ssc, vvi, xtr, zma, gma, tni, dre, ggo, tgu, tru, bdi, aca                                                                                                |
| Pathway            | KEGG                                                                                                                                       | KEGG                 | hsa, mmu, dme, dre                                                                                                                                                                                                                             |
|                    | BBID                                                                                                                                       | DAVID (6.7)          | hsa                                                                                                                                                                                                                                            |
|                    | EC NUMBER                                                                                                                                  |                      | hsa, mmu, dme, gga, ocu, ath, cel, cin, cre, eca, mml, oar, ola, osa, ptc, ptr, sbi, ssc, vvi, xtr, zma, gma, tni, dre, ggo, tgu, tru, bdi, aca                                                                                                |
|                    | PANTHER                                                                                                                                    |                      | hsa, mmu, dme, gga, ocu, ath, cel, cin, cre, eca, mml, oar, ola, osa, ptc, ptr, sbi, ssc, vvi, xtr, zma, gma, tni, ggo, tgu                                                                                                                    |
|                    | REACTOME                                                                                                                                   |                      | hsa, mmu, dme, gga, ocu                                                                                                                                                                                                                        |
| Protein domain     | BLOCKS                                                                                                                                     | DAVID (6.7)          | hsa, mmu, dme, gga, ocu, ath, cel, cin, cre, eca, mml, oar, ola, osa, ptc, ptr, sbi, ssc, vvi, xtr, zma, gma, tni, dre, ggo, tgu, tru                                                                                                          |
|                    | COG                                                                                                                                        |                      | hsa, mmu, dme, gga, ocu, ath, cel, cin, cre, eca, mml, oar, ola, osa, ptc, ptr, sbi, ssc, vvi, xtr, zma, tni, dre, tgu, tru, aca                                                                                                               |
|                    | PANTHER Family                                                                                                                             |                      | hsa, mmu, dme, gga, ocu, ath, cel, cin, cre, eca, mml, oar, ola, osa, ptc, ptr, sbi, ssc, vvi, xtr, zma, gma, tni, ggo                                                                                                                         |
|                    | PANTHER subfamily                                                                                                                          |                      | hsa, mmu, dme, gga, ocu, ath, cel, cin, cre, eca, mml, oar, ola, osa, ptc, ptr, sbi, ssc, vvi, xtr, zma, gma, tni, ggo                                                                                                                         |
|                    | RFAM                                                                                                                                       |                      | hsa                                                                                                                                                                                                                                            |
|                    | PIR superfamily                                                                                                                            |                      | hsa, mmu, dme, gga, ocu, ath, cel, cin, cre, eca, mml, oar, ola, osa, ptc, ptr, sbi, ssc, vvi, xtr, zma, gma, tni, dre, ggo, tgu, tru, bdi                                                                                                     |
|                    | PRINTS                                                                                                                                     |                      | hsa, mmu, dme, gga, ocu, ath, cel, cin, cre, eca, mml, oar, ola, osa, ptc, ptr, sbi, ssc, vvi, xtr, zma, gma, tni, dre, ggo, tgu, tru, bdi, aca                                                                                                |
|                    | PRODOM                                                                                                                                     |                      | hsa, mmu, dme, gga, ocu, ath, cel, cin, cre, eca, mml, oar, ola, osa, ptc, ptr, sbi, ssc, vvi, xtr, zma, gma, tni, dre, ggo, tgu, tru, bdi                                                                                                     |
|                    | PROFILE                                                                                                                                    |                      | hsa, mmu                                                                                                                                                                                                                                       |
|                    | PROSITE                                                                                                                                    |                      | hsa, mmu, dme, gga, ocu, ath, cel, cin, cre, eca, mml, oar, ola, osa, ptc, ptr, sbi, ssc, vvi, xtr, zma, gma, tni, dre, ggo, tru, bdi, aca                                                                                                     |
|                    | SCOP class                                                                                                                                 |                      | hsa, mmu                                                                                                                                                                                                                                       |
|                    | SCOP family                                                                                                                                |                      | hsa, mmu                                                                                                                                                                                                                                       |
|                    | SCOP fold                                                                                                                                  |                      | hsa, mmu                                                                                                                                                                                                                                       |
|                    | SCOP suofamily                                                                                                                             |                      | hsa, mmu                                                                                                                                                                                                                                       |
|                    | SMART                                                                                                                                      |                      | hsa, mmu, dme, gga, ocu, ath, cel, cin, cre, eca, mml, oar, ola, osa, ptc, ptr, sbi, ssc, vvi, xtr, zma, gma, dre, tgu, tru, bdi                                                                                                               |
| SSF                | hsa, mmu, dme, gga, ocu, ath, cel, cin, cre, eca, mml, oar, ola, osa, ptc, ptr, sbi, ssc, vvi, xtr, zma, gma, tni, dre, ggo, tgu, tru, bdi |                      |                                                                                                                                                                                                                                                |
| TIGRFAMS           | hsa, mmu, dme, gga, ocu, ath, cel, cin, cre, eca, mml, oar, ola, osa, ptc, ptr, sbi, ssc, vvi, xtr, zma, gma, tni, dre, ggo, tgu, tru, bdi |                      |                                                                                                                                                                                                                                                |
