# Supplementary figures and images for: CPSS 2.0: a computational platform update for the analysis of small RNA sequencing data
Source: PubMed Central journal article supplement — Bioinformatics. 2017 Feb 8;33(20):3289–91. doi: 10.1093/bioinformatics/btx066 (PMC5860027; doi:10.1093/bioinformatics/btx066), 2017-02-08

# Supplementary figure 1

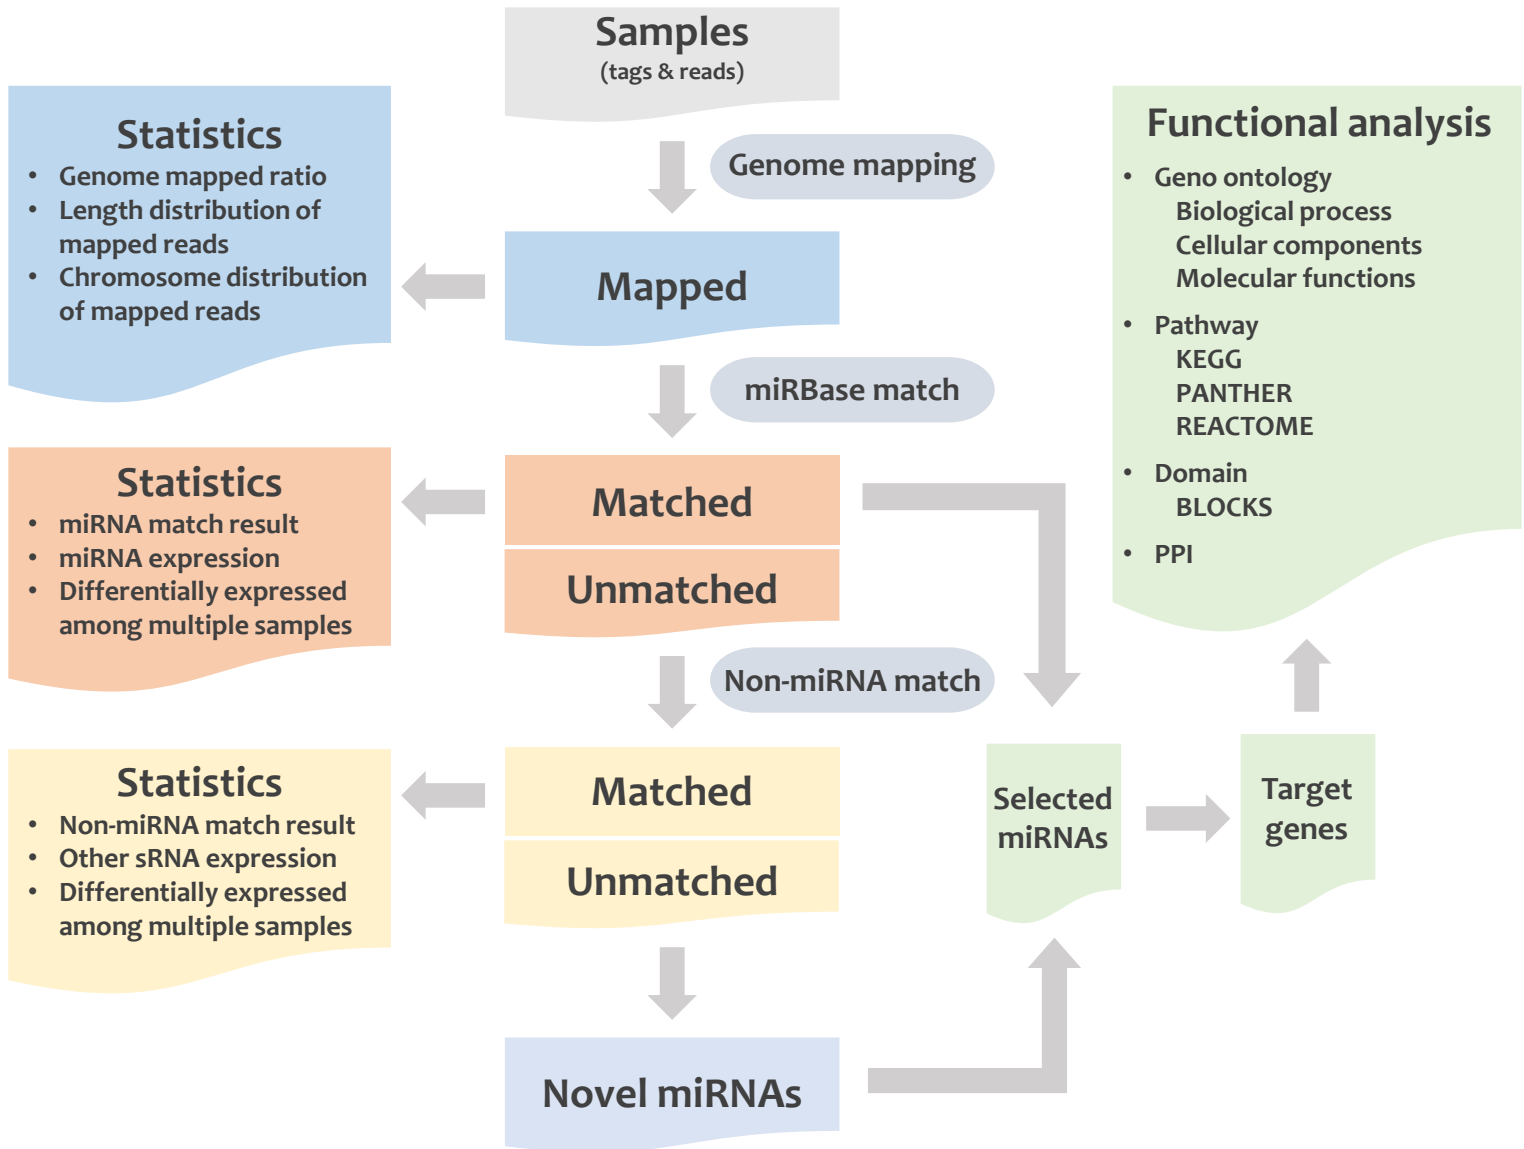

Supplement: btx066_supplementary_figure_1.pdf [file btx066_supplementary_figure_1.pdf]
